# Supplementary material
Source: MDPI journal article supplement (https://www.mdpi.com/2073-4441/14/4/534)
Supplement: s1 [file s1]

# Groundwater Vulnerability Analysis of Tirnavos Basin, Central Greece: An Application of RIVA Method

Ioannis Vrouhakis <sup>1,2,\*</sup>, Evangelos Tziritis <sup>2</sup>, Georgios Stamatis <sup>1</sup>, and Andreas Panagopoulos <sup>2</sup>

**Table S1.** Correlation between annual precipitation (mm/y), P values and vulnerability classes.

| P (mm/y)             | P Value | Vulnerability Class | Vulnerability Characterization |
|----------------------|---------|---------------------|--------------------------------|
| <200 or >1600        | 0       | I                   | Very Low (VL)                  |
| 200–400 or 1400–1600 | 1       | II                  | Low (L)                        |
| 400–600 or 1200–1400 | 2.5     | III                 | Medium (M)                     |
| 600–800 or 1000–1200 | 3.5     | IV                  | High (H)                       |
| 800–1000             | 5       | V                   | Very High (VH)                 |

**Table S2.** Correlation between rainfall intensity (mm/d), In values and vulnerability classes.

| Rain intensity (mm/day) | In Value | Vulnerability class | Vulnerability Characterization |
|-------------------------|----------|---------------------|--------------------------------|
| <5                      | 0.0      | I                   | Very Low (VL)                  |
| 5–10                    | 0.4      | II                  | Low (L)                        |
| >10–15                  | 1.0      | III                 | Medium (M)                     |
| >15–20                  | 1.4      | IV                  | High (H)                       |
| >20                     | 2.0      | V                   | Very High (VH)                 |

**Table S3.** Correlation between irrigation dose, In values and vulnerability class.

| Irrigation dose                                                          | In Values | Vulnerability Class | Vulnerability Characterization |
|--------------------------------------------------------------------------|-----------|---------------------|--------------------------------|
| Non irrigated area or deficiently irrigated (lower than suggested)       | 0         | I – II              | Very Low (VL) – Low (L)        |
| Nominal irrigation (suggested according to local experts or agronomists) | 1         | III                 | Medium (M)                     |
| Excessive irrigation (greater than suggested)                            | 3         | IV – V              | High (H) – Very High (VH)      |

**Table S4.** Classification of topographic slope (s) and correlation with vulnerability classes.

| Topographic Slope        | Vulnerability Classes | s Values |
|--------------------------|-----------------------|----------|
| $\leq 3^\circ$           | V                     | 10       |
| $>3^\circ$ – $6^\circ$   | IV                    | 7        |
| $>6^\circ$ – $12^\circ$  | III                   | 5        |
| $>12^\circ$ – $25^\circ$ | II                    | 2        |
| $> 25^\circ$             | I                     | 0        |

**Table S5.** Categorization of vegetation according to CORINE land use classification (EEA, 2020).

| Vegetation                     | CORINE Category                                     |
|--------------------------------|-----------------------------------------------------|
| Low vegetation                 | 2.1 Arable land                                     |
|                                | 2.2 Permanent crops                                 |
|                                | 2.3 Pastures                                        |
|                                | 2.4 Heterogeneous agricultural areas                |
|                                | 3.2 Scrub and/or herbaceous vegetation associations |
| High vegetation                | 3.1 Forests                                         |
| Bare land or sparse vegetation | 3.3 Open areas with little or no vegetation         |

**Table S6.** Calculation of F values according to soil (s) and vegetation (v) parameters and link with vulnerability classes.

|            |                                | Slope (s) |          |           |           |           |
|------------|--------------------------------|-----------|----------|-----------|-----------|-----------|
|            |                                | ≤3°       | 3°–6°    | > 6°–12°  | > 12°–25° | >25°      |
| Vegetation | High vegetation                | 5 (V)     | 5 (V)    | 5 (V)     | 3.5 (IV)  | 2.5 (III) |
|            | Low vegetation                 | 5 (V)     | 5 (V)    | 3.5 (IV)  | 2.5 (III) | 1 (II)    |
|            | Bare land or sparse vegetation | 5 (V)     | 3.5 (IV) | 2.5 (III) | 1 (II)    | 0 (I)     |

**Table S7.** Calculation of S values for the soils and correlation with the vulnerability class (USDA, 1999).

| Soil type | Texture                                                  | Permeability | Vulnerability Class | S Value |
|-----------|----------------------------------------------------------|--------------|---------------------|---------|
| A1        | Sand                                                     | Very High    | V                   | 5       |
| A2        | Loamy sand, sandy loam                                   | High         | IV                  | 3.5     |
| B         | Silt loam, loam, silt                                    | Medium       | III                 | 2.5     |
| C         | Sandy clay loam                                          | Low          | II                  | 1       |
| D         | Clay loam, silty clay loam, sandy clay, silty clay, clay | Very low     | I                   | 0       |

**Table S8.** Calculation of S values for consolidated geological formations and correlation with permeability and the vulnerability class (Lewis et al., 2006).

| Geological Formation | Affecting Factor <sup>1</sup> | Intensity of Affecting Factor <sup>2</sup> | Permeability  | S Value          | Vulnerability Class |
|----------------------|-------------------------------|--------------------------------------------|---------------|------------------|---------------------|
| Limestone            | a–b                           | (VL–L, M, H–VH)                            | (L, M, H)     | (2.5, 3.5, 5)    | (III, IV, V)        |
| Sandstone            | b                             | (VL–L, M, H–VH)                            | (L, M, H)     | (1, 2.5, 3.5)    | (II, III, IV)       |
| Mudstone/shale       | b                             | (VL–L, M, H–VH)                            | (L, M, H)     | (0, 1)           | (I, II)             |
| Granite              | b                             | (VL–L, M, H–VH)                            | (L, M, H)     | (1, 2.5)         | (II, III)           |
| Gneiss               | b                             | (VL–L, M, H–VH)                            | (L, M, H)     | (1, 2.5)         | (II, III)           |
| Dolostone            | a–b                           | (VL–L, M, H–VH)                            | (L, M, H)     | (2.5, 3.5, 5)    | (III, IV, V)        |
| Schist               | b                             | (VL–L, M, H–VH)                            | (L, M, H)     | (1, 2.5)         | (II, III)           |
| Marble               | a–b                           | (VL–L, M, H–VH)                            | (VL, L, M, H) | (1, 2.5, 3.5, 5) | (II, III, IV, V)    |
| Basalt               | b                             | (VL–L, M, H–VH)                            | (L, M, H)     | (1, 2.5, 3.5)    | (II, III, IV)       |
| Ophiolite            | b                             | (VL–L, M, H–VH)                            | (L, M, H)     | (1, 2.5, 3.5)    | (II, III, IV)       |
| Marl                 | b                             | (VL–L, M, H–VH)                            | (L, M, H)     | (1, 2.5)         | (II, III)           |
| All                  | c                             | (VL–L, M, H–VH)                            |               |                  |                     |

<sup>1</sup> Indicative but not limited to (a) karstification, (b) fracturing, (c) intercalations with low permeability horizons. <sup>2</sup> V.L.: very low, L: low, M: medium, H: high, V.H.: very high

**Table S9.** Classification of layer reference values (ly) for representative geological formations.

| Layer reference Value (ly) | Geological Formation                                                                                                                                 |
|----------------------------|------------------------------------------------------------------------------------------------------------------------------------------------------|
| 5000                       | Claystone, siltstone, mudstone, shale, slate                                                                                                         |
| 1000                       | Marl, granite, gneiss, schist, basalt, ophiolite, flysch, sandstone, marble, quartzite                                                               |
| 500                        | Alluvial deposits with high clayey content, marly limestones                                                                                         |
| 100                        | Limestone, dolostone, conglomerates, breccias, turf and other organic rich formations, alluvial deposits with average clayey content, volcanic tuffs |
| 10                         | Sand                                                                                                                                                 |
| 1                          | Gravel, colluvium, debris, weathered zones, crust, mylonitized formations                                                                            |

**Table S10.** “f” factor values according to the assessed fracturing or karstification degree.

| Fracturing or Karstification Degree | f    |
|-------------------------------------|------|
| Negligible or none or N/A           | 1    |
| Low                                 | 0.5  |
| Medium                              | 0.1  |
| High                                | 0.01 |

**Table S11.** Protective cover (pc) values and corresponding vulnerability characterization and V factor values.

| pc Value    | V Factor | Vulnerability Class | Vulnerability Characterization |
|-------------|----------|---------------------|--------------------------------|
| <250        | 10       | V                   | Very High (VH)                 |
| 250–1000    | 7        | IV                  | High (H)                       |
| 1000–5000   | 5        | III                 | Medium (M)                     |
| 5000–15,000 | 2        | II                  | Low (L)                        |
| >15,000     | 0        | I                   | Very low (VL)                  |

**Table S12.** The suggested link between hydraulic conductivity and A factor values, corresponding to specific vulnerability class.

| Hydraulic Conductivity (cm/s) | A Values | Vulnerability Class |
|-------------------------------|----------|---------------------|
| $<10^{-7}$                    | 0        | I                   |
| $10^{-7}$ – $10^{-5}$         | 2        | II                  |
| $>10^{-57}$ – $10^{-3}$       | 5        | III                 |
| $>10^{-37}$ – $10^{-1}$       | 7        | IV                  |
| $>10^{-1}$                    | 10       | V                   |
